# Supplementary material for: MiR-148a inhibits oral squamous cell carcinoma progression through ERK/MAPK pathway via targeting IGF-IR
Source: Oxford University Press journal article supplement (doi:10.1042/bsr20182458), 2020-03-23

**Supplementary figure 1.** Model figure for present findings.

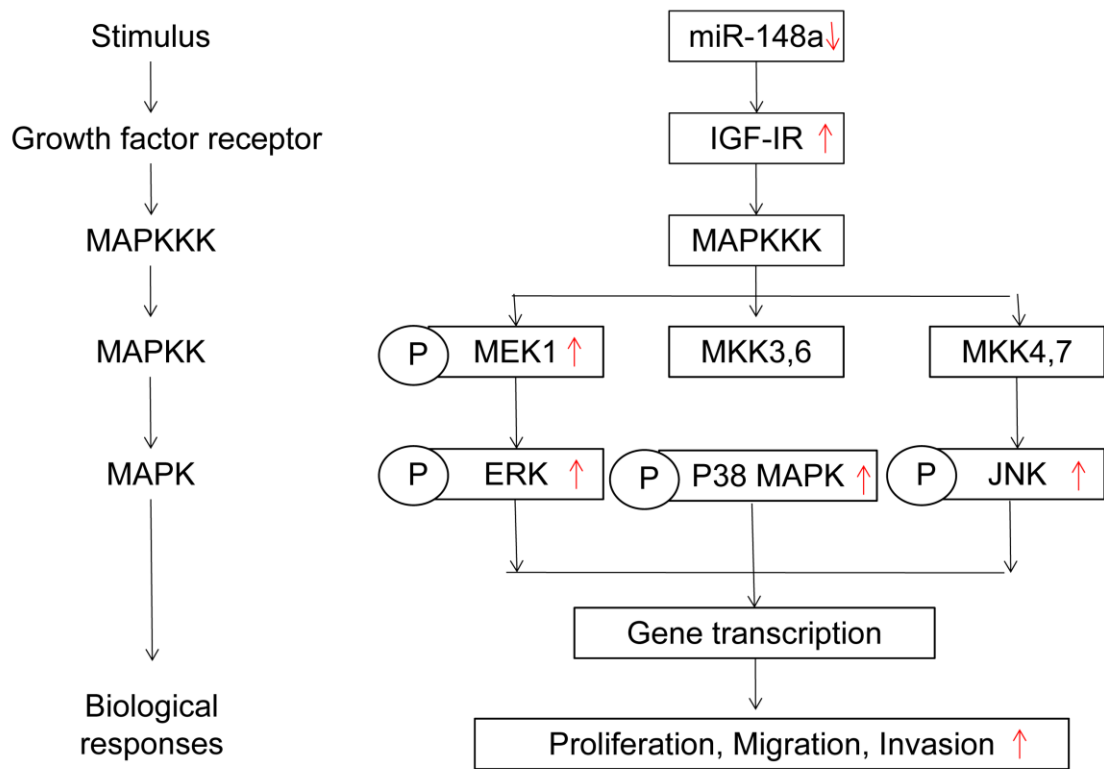

Supplement: bsr-2018-2458_supp.pdf [file bsr-2018-2458_supp.pdf]
